# Supplementary material
Source: PubMed Central journal article supplement (PMC5772235)
Supplement: AEM.02199-17_zam003188285s1.pdf [file AEM.02199-17_zam003188285s1.pdf]

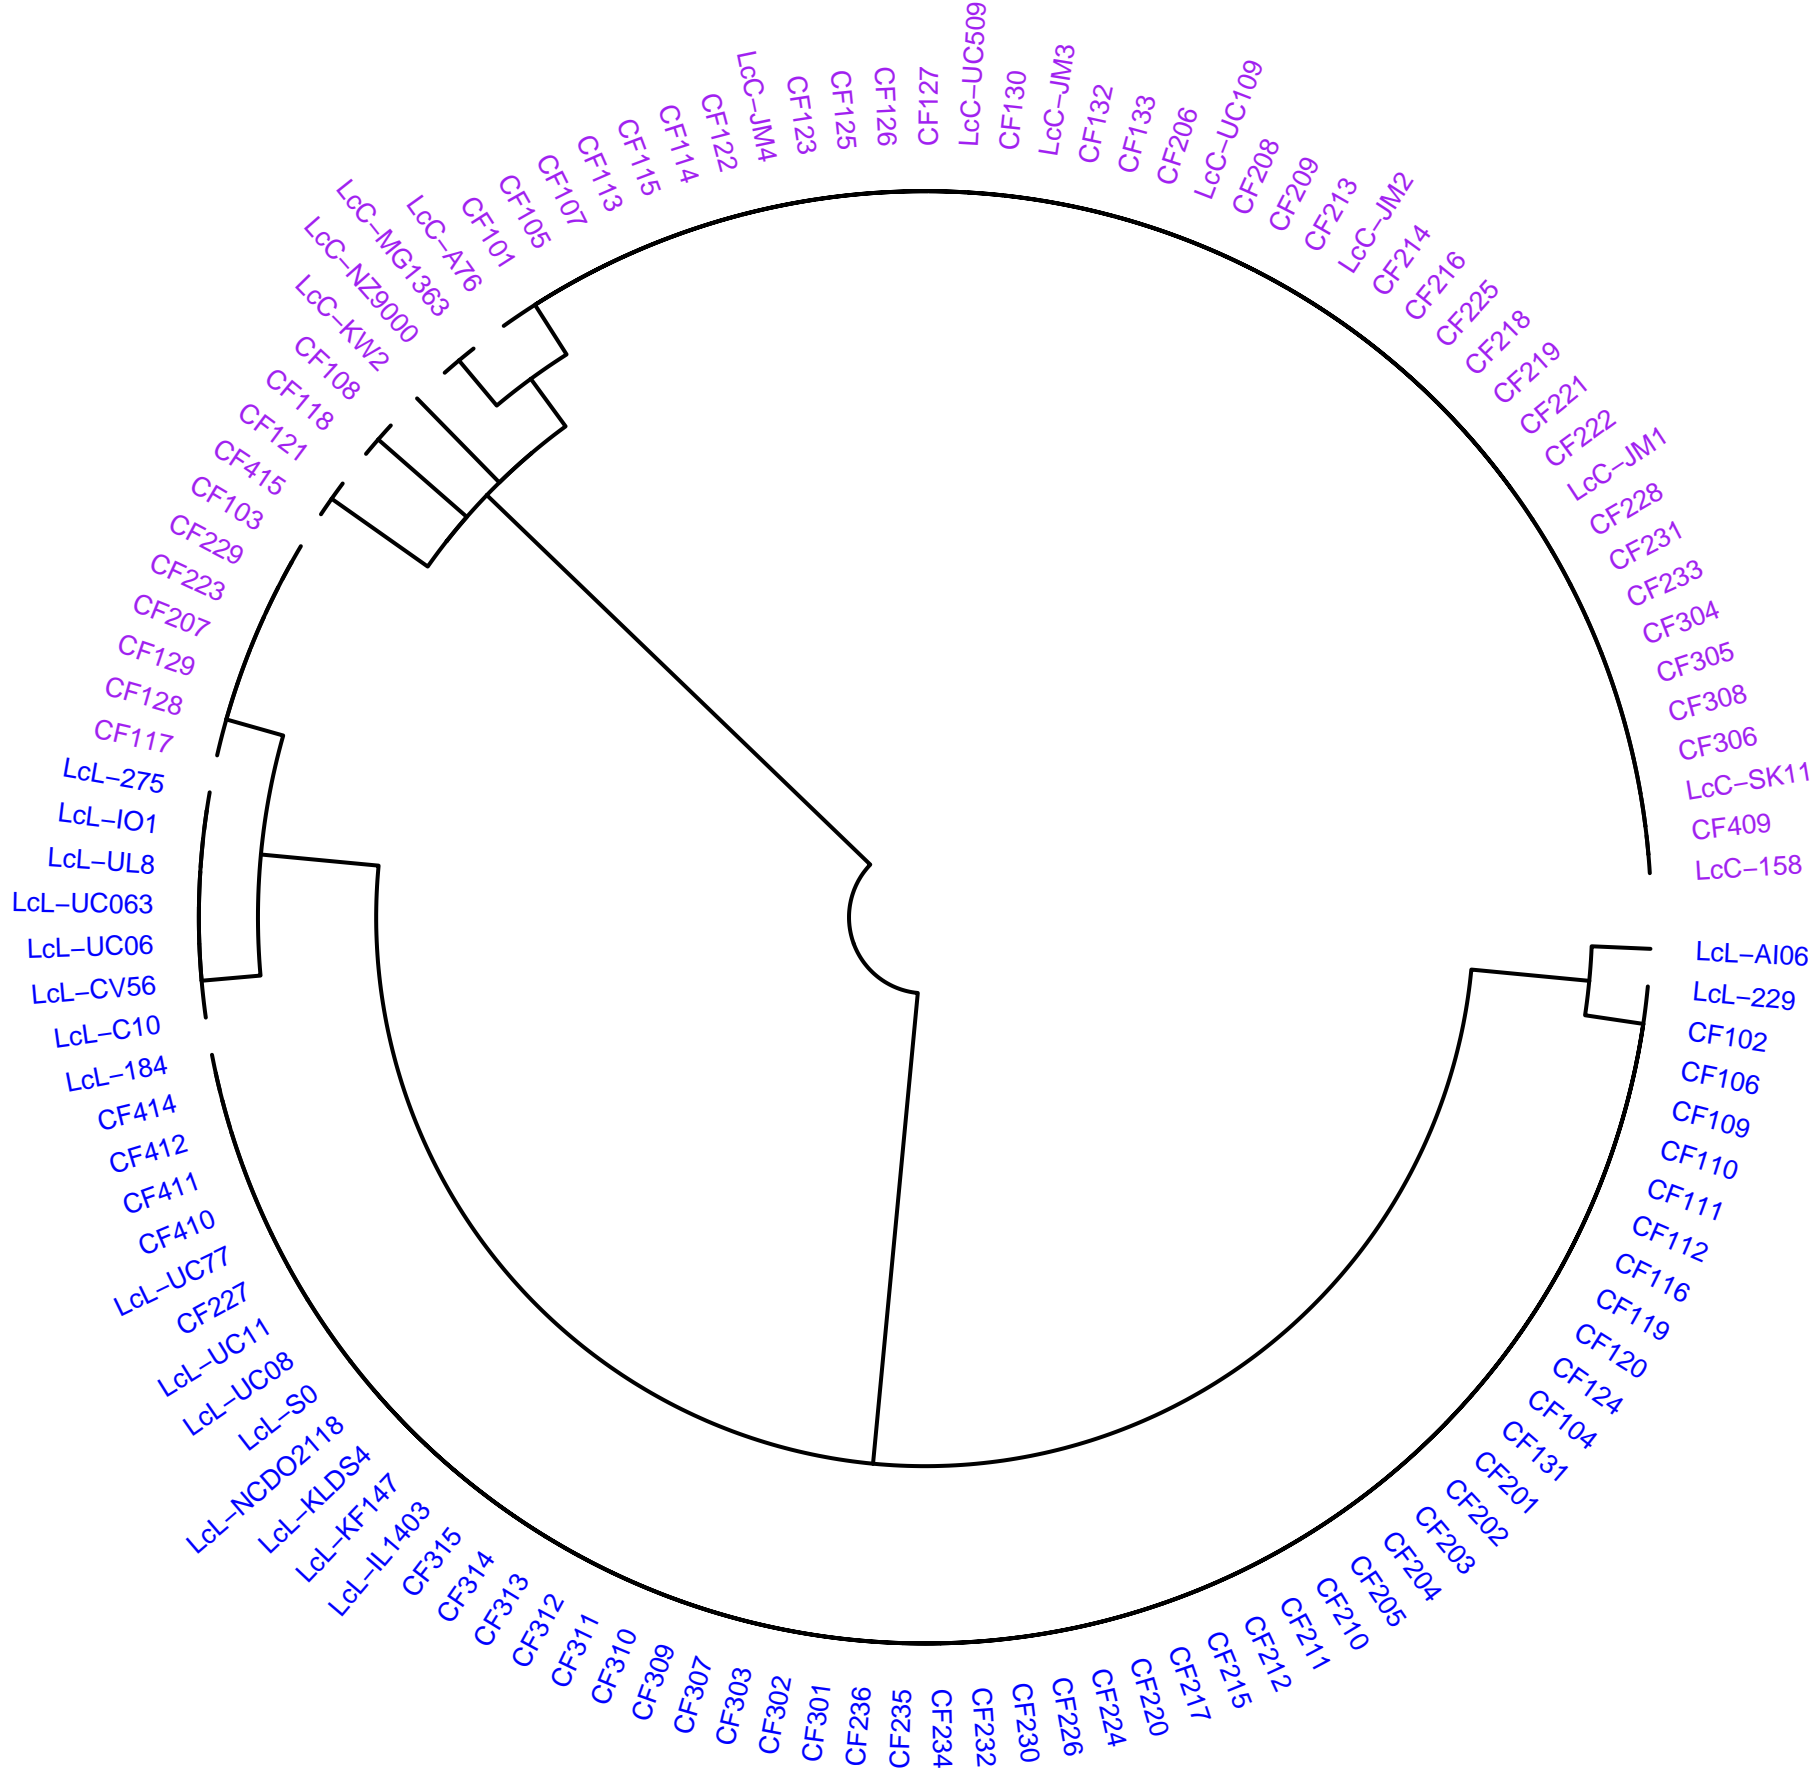

Supplementary Figure S1: Differentiation of *Lactococcus lactis* using 16S rDNA. Subspecies classification is indicated by the label color, purple indicates *Lactococcus lactis* subsp. *cremoris* while blue indicates *Lactococcus lactis* subsp. *lactis*.

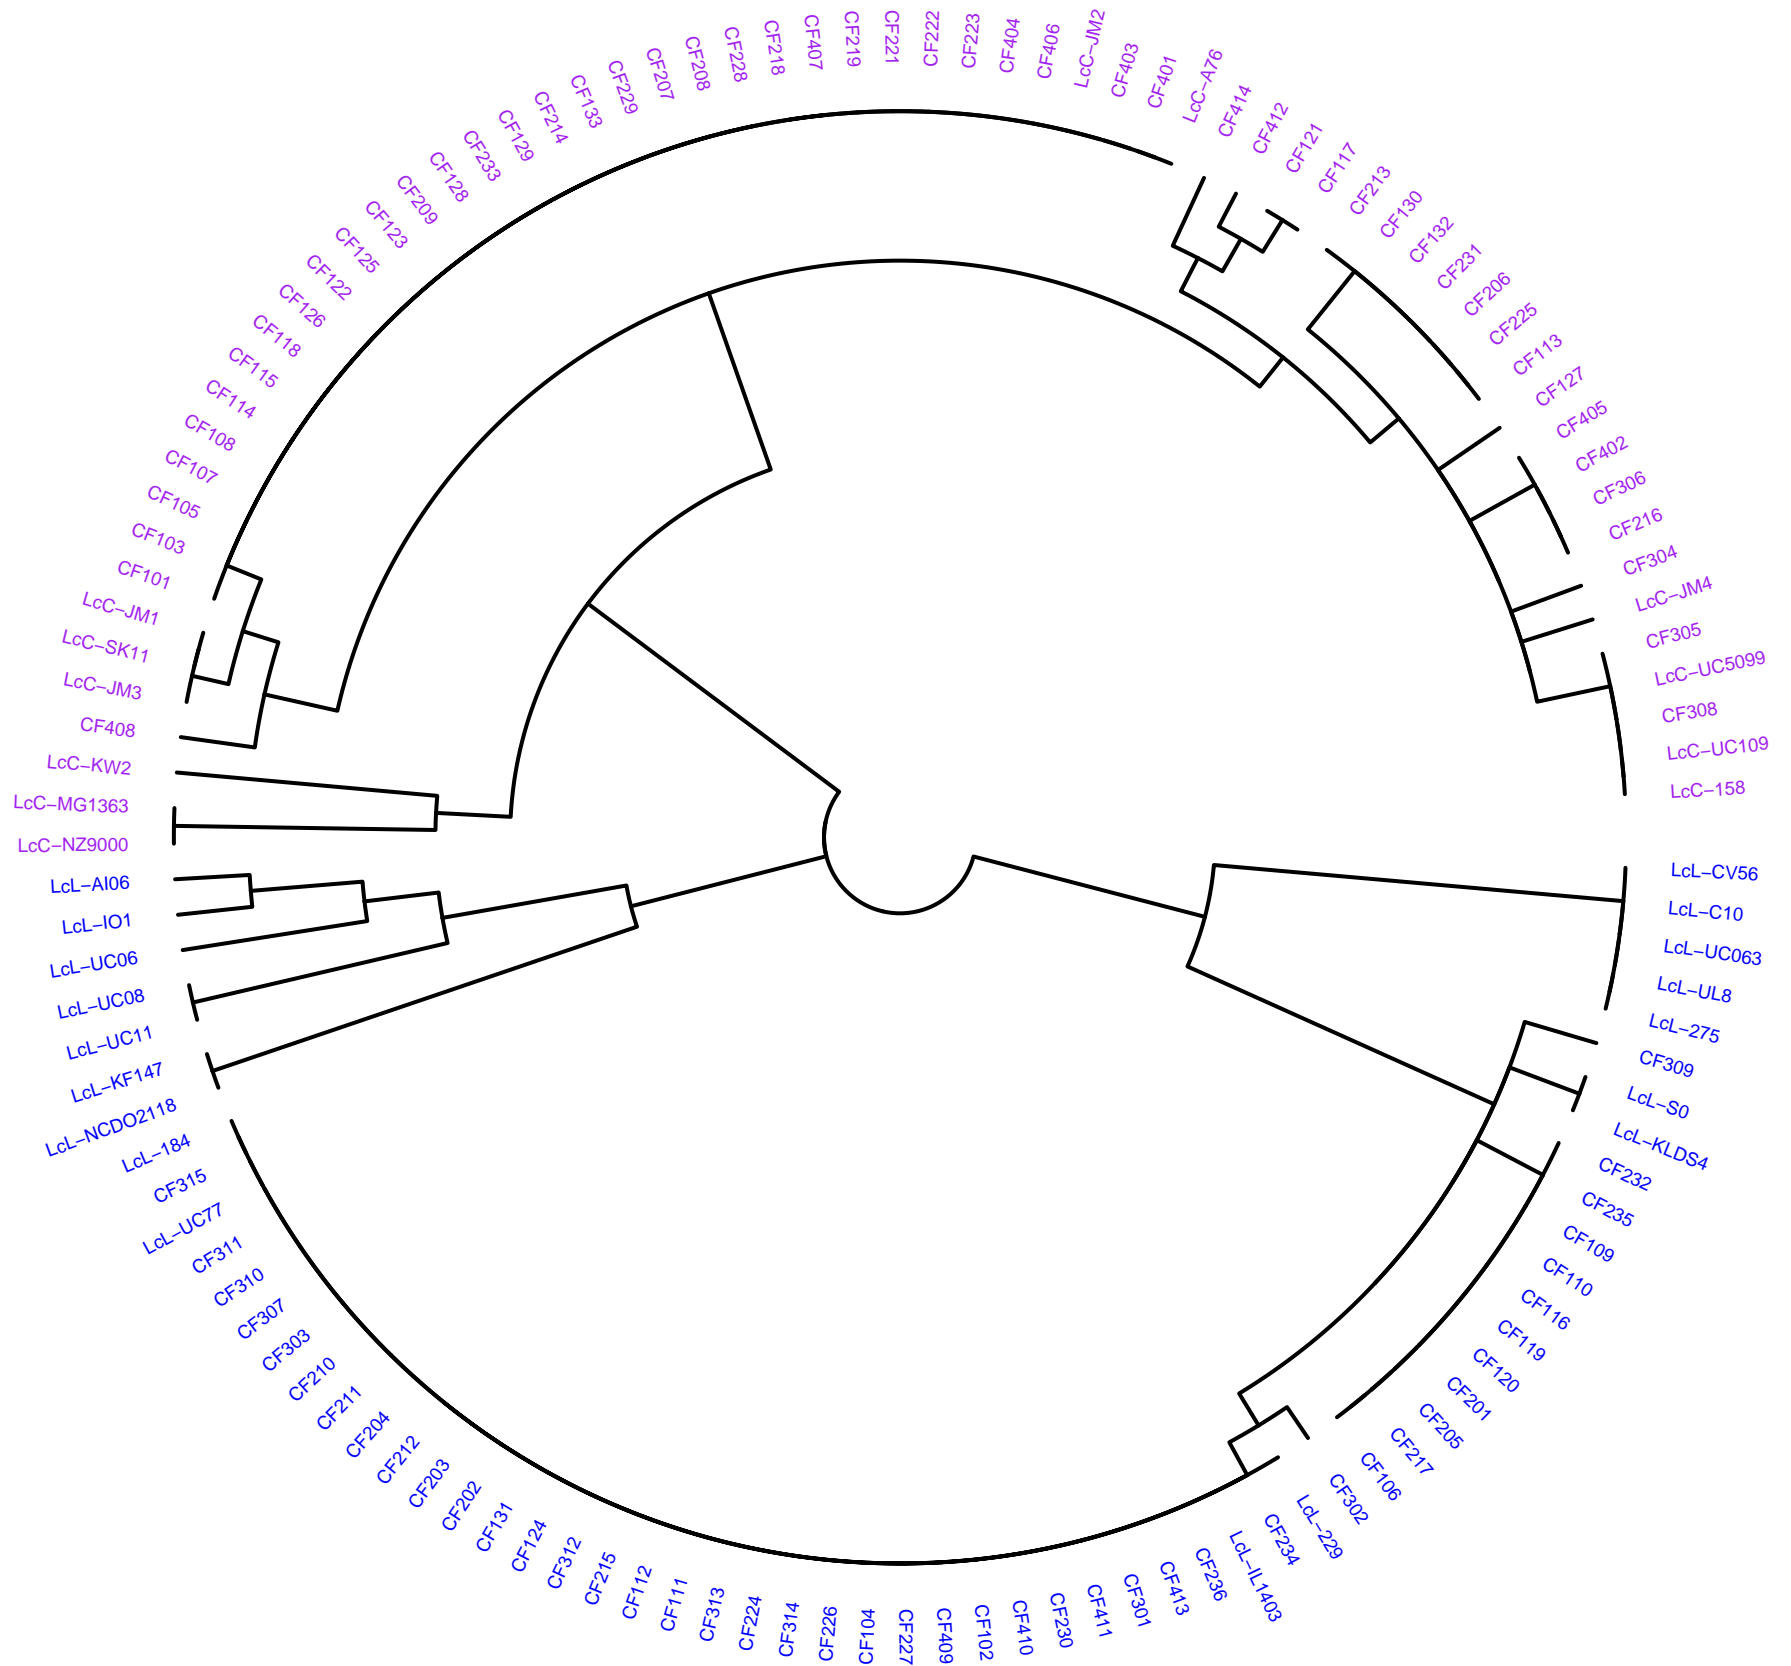

Supplementary Figure S2: Differentiation of *Lactococcus lactis* isolates by purR. Subspecies is indicated by the label color, purple indicates *Lactococcus lactis* subsp. *cremoris* while blue indicates *Lactococcus lactis* subsp. *lactis*.

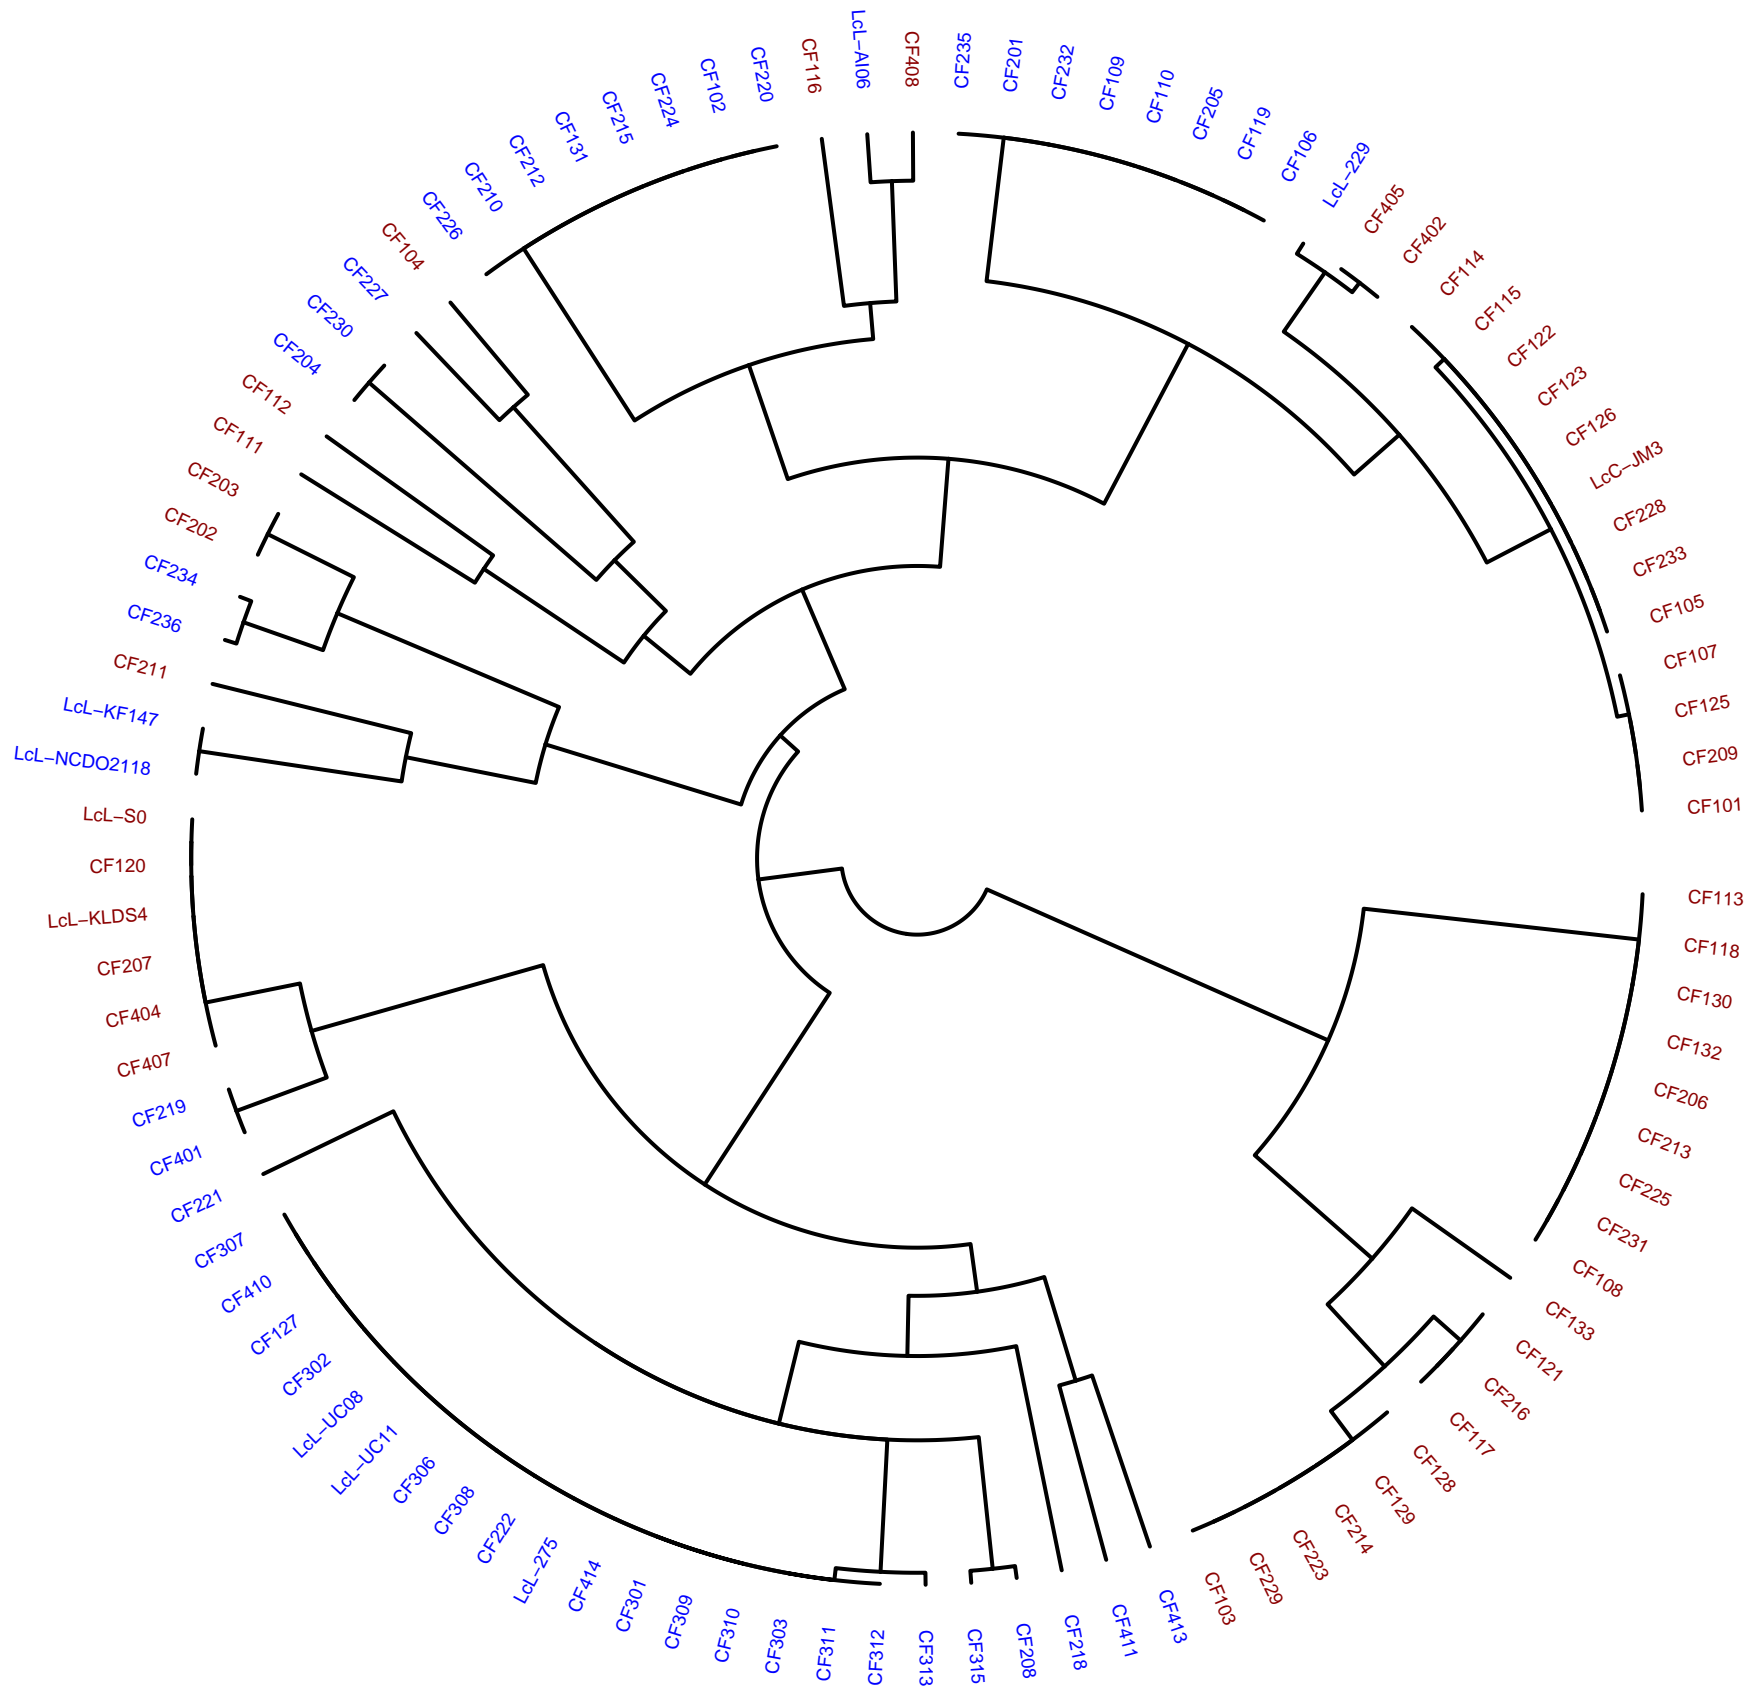

Supplementary Figure S3: Differentiation of *Lactococcus lactis* isolates by *epsD*. Subspecies is indicated by the label color, purple indicates *Lactococcus lactis* subsp. *cremoris* while blue indicates *Lactococcus lactis* subsp. *lactis*.

Supplementary table S1:

| <b>Isolate name</b> | <b>Accession No.</b> | <b>Isolation source</b> | <b>Subspecies</b> | <b>Reference</b> |
|---------------------|----------------------|-------------------------|-------------------|------------------|
| <b>IL1403</b>       | AE005176             | Dairy                   | lactis            | (1)              |
| <b>MG1363</b>       | AM406671             | Laboratory isolate      | cremoris          | (2)              |
| <b>IO1</b>          | AP012281             | Drain water             | lactis            | (3)              |
| <b>SK11</b>         | CP000425             | Dairy                   | cremoris          | (4)              |
| <b>KF147</b>        | CP001834             | Mung bean sprout        | lactis            | (5)              |
| <b>NZ9000</b>       | CP002094             | Laboratory isolate      | cremoris          | (6)              |
| <b>CV56</b>         | CP002365             | Human                   | lactis            | (7)              |
| <b>A76</b>          | CP003132             | Dairy                   | cremoris          | (8)              |
| <b>UC509.9</b>      | CP003157             | Dairy                   | cremoris          | (9)              |
| <b>KW2</b>          | CP004884             | Dairy                   | cremoris          | (10)             |
| <b>KLDS 4.0325</b>  | CP006766             | Koumiss                 | lactis            | (11)             |
| <b>NCDO2118</b>     | CP009054             | Frozen peas             | lactis            | (12)             |
| <b>AI06</b>         | CP009472             | Acai palm               | lactis            | (13)             |
| <b>S0</b>           | CP010050             | Dairy                   | lactis            | (14)             |
| <b>158</b>          | CP015894             | Dairy                   | cremoris          | (15)             |
| <b>184</b>          | CP015895             | Dairy                   | lactis            | (15)             |
| <b>275</b>          | CP015897             | Dairy                   | lactis            | (15)             |
| <b>229</b>          | CP015896             | Dairy                   | lactis            | (15)             |
| <b>C10</b>          | CP015898             | Dairy                   | lactis            | (15)             |
| <b>JM1</b>          | CP015899             | Dairy                   | cremoris          | (15)             |
| <b>JM2</b>          | CP015900             | Dairy                   | cremoris          | (15)             |
| <b>JM3</b>          | CP015901             | Dairy                   | cremoris          | (15)             |
| <b>UC06</b>         | CP015902             | Dairy                   | lactis            | (15)             |
| <b>UC08</b>         | CP015903             | Fermented meat          | lactis            | (15)             |
| <b>UC11</b>         | CP015904             | Fermented meat          | lactis            | (15)             |
| <b>UC063</b>        | CP015905             | Dairy                   | lactis            | (15)             |
| <b>UC77</b>         | CP015906             | Dairy                   | lactis            | (15)             |
| <b>UC109</b>        | CP015907             | Dairy                   | cremoris          | (15)             |
| <b>UL8</b>          | CP015908             | Dairy                   | lactis            | (15)             |
| <b>JM4</b>          | CP015909             | Dairy                   | cremoris          | (15)             |
| <b>CF101</b>        |                      | Culture A               | cremoris          | **               |
| <b>CF102</b>        |                      | Culture A               | lactis            | **               |
| <b>CF103</b>        |                      | Culture A               | cremoris          | **               |
| <b>CF104</b>        |                      | Culture A               | lactis            | **               |
| <b>CF105</b>        |                      | Culture A               | cremoris          | **               |
| <b>CF106</b>        |                      | Culture A               | lactis            | **               |
| <b>CF107</b>        |                      | Culture A               | cremoris          | **               |
| <b>CF108</b>        |                      | Culture A               | cremoris          | **               |
| <b>CF109</b>        |                      | Culture A               | lactis            | **               |

|       |  |           |          |    |
|-------|--|-----------|----------|----|
| CF110 |  | Culture A | lactis   | ** |
| CF111 |  | Culture A | lactis   | ** |
| CF112 |  | Culture A | lactis   | ** |
| CF113 |  | Culture A | cremoris | ** |
| CF114 |  | Culture A | cremoris | ** |
| CF115 |  | Culture A | cremoris | ** |
| CF116 |  | Culture A | lactis   | ** |
| CF117 |  | Culture A | cremoris | ** |
| CF118 |  | Culture A | cremoris | ** |
| CF119 |  | Culture A | lactis   | ** |
| CF120 |  | Culture A | lactis   | ** |
| CF121 |  | Culture A | cremoris | ** |
| CF122 |  | Culture A | cremoris | ** |
| CF123 |  | Culture A | cremoris | ** |
| CF124 |  | Culture A | lactis   | ** |
| CF125 |  | Culture A | cremoris | ** |
| CF126 |  | Culture A | cremoris | ** |
| CF127 |  | Culture A | cremoris | ** |
| CF128 |  | Culture A | cremoris | ** |
| CF129 |  | Culture A | cremoris | ** |
| CF130 |  | Culture A | cremoris | ** |
| CF131 |  | Culture A | lactis   | ** |
| CF132 |  | Culture A | cremoris | ** |
| CF133 |  | Culture A | cremoris | ** |
| CF201 |  | Culture A | lactis   | ** |
| CF202 |  | Culture A | lactis   | ** |
| CF203 |  | Culture A | lactis   | ** |
| CF204 |  | Culture A | lactis   | ** |
| CF205 |  | Culture A | lactis   | ** |
| CF206 |  | Culture A | cremoris | ** |
| CF207 |  | Culture A | cremoris | ** |
| CF208 |  | Culture A | cremoris | ** |
| CF209 |  | Culture A | cremoris | ** |
| CF210 |  | Culture A | lactis   | ** |
| CF211 |  | Culture A | lactis   | ** |
| CF212 |  | Culture A | lactis   | ** |
| CF213 |  | Culture A | cremoris | ** |
| CF214 |  | Culture A | cremoris | ** |
| CF215 |  | Culture A | lactis   | ** |
| CF216 |  | Culture A | cremoris | ** |
| CF217 |  | Culture A | lactis   | ** |
| CF218 |  | Culture A | cremoris | ** |
| CF219 |  | Culture A | cremoris | ** |
| CF220 |  | Culture A | lactis   | ** |

|       |  |           |          |    |
|-------|--|-----------|----------|----|
| CF221 |  | Culture A | cremoris | ** |
| CF222 |  | Culture A | cremoris | ** |
| CF223 |  | Culture A | cremoris | ** |
| CF224 |  | Culture A | lactis   | ** |
| CF225 |  | Culture A | cremoris | ** |
| CF226 |  | Culture A | lactis   | ** |
| CF227 |  | Culture A | lactis   | ** |
| CF228 |  | Culture A | cremoris | ** |
| CF229 |  | Culture A | cremoris | ** |
| CF230 |  | Culture A | lactis   | ** |
| CF231 |  | Culture A | cremoris | ** |
| CF232 |  | Culture A | lactis   | ** |
| CF233 |  | Culture A | cremoris | ** |
| CF234 |  | Culture A | lactis   | ** |
| CF235 |  | Culture A | lactis   | ** |
| CF236 |  | Culture A | lactis   | ** |
| CF301 |  | Culture C | lactis   | ** |
| CF302 |  | Culture C | lactis   | ** |
| CF303 |  | Culture C | lactis   | ** |
| CF304 |  | Culture C | cremoris | ** |
| CF305 |  | Culture C | cremoris | ** |
| CF306 |  | Culture C | cremoris | ** |
| CF307 |  | Culture C | lactis   | ** |
| CF308 |  | Culture C | cremoris | ** |
| CF309 |  | Culture C | lactis   | ** |
| CF310 |  | Culture C | lactis   | ** |
| CF311 |  | Culture C | lactis   | ** |
| CF312 |  | Culture C | lactis   | ** |
| CF313 |  | Culture C | lactis   | ** |
| CF314 |  | Culture C | lactis   | ** |
| CF315 |  | Culture C | lactis   | ** |
| CF401 |  | Culture B | cremoris | ** |
| CF402 |  | Culture B | cremoris | ** |
| CF403 |  | Culture B | cremoris | ** |
| CF404 |  | Culture B | cremoris | ** |
| CF405 |  | Culture B | cremoris | ** |
| CF406 |  | Culture B | cremoris | ** |
| CF407 |  | Culture B | cremoris | ** |
| CF408 |  | Culture B | cremoris | ** |
| CF409 |  | Culture B | lactis   | ** |
| CF410 |  | Culture B | lactis   | ** |
| CF411 |  | Culture B | lactis   | ** |
| CF412 |  | Culture B | cremoris | ** |
| CF413 |  | Culture B | lactis   | ** |

|              |  |           |          |    |
|--------------|--|-----------|----------|----|
| <b>CF414</b> |  | Culture B | cremoris | ** |
|--------------|--|-----------|----------|----|

\*\* Isolates provided in this study

1. **Bolotin A, Wincker P, Mauger S, Jaillon O, Malarme K, Weissenbach J, Ehrlich SD, Sorokin A.** 2001. The Complete Genome Sequence of the Lactic Acid Bacterium *Lactococcus lactis* ssp. *lactis* IL1403. *Genome Res* **11**:731-753.
2. **Wegmann U, O'Connell-Motherway M, Zomer A, Buist G, Shearman C, Canchaya C, Ventura M, Goesmann A, Gasson MJ, Kuipers OP, van Sinderen D, Kok J.** 2007. Complete Genome Sequence of the Prototype Lactic Acid Bacterium *Lactococcus lactis* subsp. *cremoris* MG1363. *J Bacteriol* **189**:3256-3270.
3. **Kato H, Shiwa Y, Oshima K, Machii M, Araya-Kojima T, Zendo T, Shimizu-Kadota M, Hattori M, Sonomoto K, Yoshikawa H.** 2012. Complete genome sequence of *Lactococcus lactis* IO-1, a lactic acid bacterium that utilizes xylose and produces high levels of L-lactic acid. *J Bacteriol* **194**:2102-2103.
4. **Makarova K, Slesarev A, Wolf Y, Sorokin A, Mirkin B, Koonin E, Pavlov A, Pavlova N, Karamychev V, Polouchine N, Shakhova V, Grigoriev I, Lou Y, Rohksar D, Lucas S, Huang K, Goodstein DM, Hawkins T, Plengvidhya V, Welker D, Hughes J, Goh Y, Benson A, Baldwin K, Lee JH, Diaz-Muniz I, Dosti B, Smeianov V, Wechter W, Barabote R, Lorca G, Altermann E, Barrangou R, Ganesan B, Xie Y, Rawsthorne H, Tamir D, Parker C, Breidt F, Broadbent J, Hutkins R, O'Sullivan D, Steele J, Unlu G, Saier M, Klaenhammer T, Richardson P, Kozyavkin S, Weimer B, Mills D.** 2006. Comparative genomics of the lactic acid bacteria. *Proc Natl Acad Sci U S A* **103**:15611-15616.
5. **Siezen RJ, Bayjanov J, Renckens B, Wels M, van Hijum SA, Molenaar D, van Hylckama Vlieg JE.** 2010. Complete genome sequence of *Lactococcus lactis* subsp. *lactis* KF147, a plant-associated lactic acid bacterium. *J Bacteriol* **192**:2649-2650.
6. **Linares DM, Kok J, Poolman B.** 2010. Genome sequences of *Lactococcus lactis* MG1363 (revised) and NZ9000 and comparative physiological studies. *J Bacteriol* **192**:5806-5812.
7. **Gao Y, Lu Y, Teng KL, Chen ML, Zheng HJ, Zhu YQ, Zhong J.** 2011. Complete Genome Sequence of *Lactococcus lactis* subsp. *lactis* CV56, a Probiotic Strain Isolated from the Vaginas of Healthy Women. *J Bacteriol* **193**:2886-2887.
8. **Bolotin A, Quinquis B, Ehrlich SD, Sorokin A.** 2012. Complete genome sequence of *Lactococcus lactis* subsp. *cremoris* A76. *J Bacteriol* **194**:1241-1242.
9. **Ainsworth S, Zomer A, de Jager V, Bottacini F, van Hijum S, Mahony J, van Sinderen D.** 2013. Complete Genome of *Lactococcus lactis* subsp. *cremoris* UC509.9, Host for a Model Lactococcal P335 Bacteriophage. *Genome Announc* **1**.
10. **Kelly WJ, Altermann E, Lambie SC, Leahy SC.** 2013. Interaction between the genomes of *Lactococcus lactis* and phages of the P335 species. *Frontiers in Microbiology* **4**:257.
11. **Yang X, Wang Y, Huo G.** 2013. Complete Genome Sequence of *Lactococcus lactis* subsp. *lactis* KLDS4.0325. *Genome Announcements* **1**:e00962-00913.
12. **Oliveira LC, Saraiva TD, Soares SC, Ramos RT, Sa PH, Carneiro AR, Miranda F, Freire M, Renan W, Junior AF, Santos AR, Pinto AC, Souza BM, Castro CP, Diniz CA, Rocha CS, Mariano DC, de Aguiar EL, Folador EL, Barbosa EG, Aburjaile FF, Goncalves LA, Guimaraes LC, Azevedo M, Agresti PC, Silva RF, Tiwari S, Almeida SS, Hassan SS, Pereira VB, Abreu VA, Pereira UP, Dorella FA, Carvalho AF, Pereira FL, Leal CA, Figueiredo HC, Silva A, Miyoshi A, Azevedo V.** 2014. Genome Sequence of *Lactococcus lactis* subsp. *lactis* NCDO 2118, a GABA-Producing Strain. *Genome Announc* **2**.
13. **McCulloch JA, de Oliveira VM, de Almeida Pina AV, Pérez-Chaparro PJ, de Almeida LM, de Vasconcelos JM, de Oliveira LF, da Silva DEA, Rogez HLG, Cretenet M, Mamizuka EM, Nunes MRT.** 2014. Complete Genome Sequence of *Lactococcus lactis* Strain AI06, an Endophyte of the Amazonian Açaí Palm. *Genome Announc* **2**.
14. **Zhao F, Ma H, Lu Y, Teng K, Kang X, Wang F, Yang X, Zhong J.** 2015. Complete genome sequence of *Lactococcus lactis* S0, an efficient producer of nisin. *J Biotechnol* **198**:15-16.

15. **Kelleher P, Bottacini F, Mahony J, Kilcawley KN, van Sinderen D.** 2017. Comparative and functional genomics of the *Lactococcus lactis* taxon; insights into evolution and niche adaptation. *BMC Genomics* **18**:267.



Supplementary table S2:

| <b>Pan-genomic <i>L. lactis</i> subsp. <i>lactis</i> lineages</b>   |                                                                                                                       |
|---------------------------------------------------------------------|-----------------------------------------------------------------------------------------------------------------------|
| <b>Lineage</b>                                                      | <b>Isolates</b>                                                                                                       |
| <b>L1</b>                                                           | CF102, CF104, CF111, CF124, CF131, CF202, CF203, CF204, CF210, CF211, CF212, CF215, CF224, CF226, CF227, CF234, CF236 |
| <b>L2</b>                                                           | CF106, CF109, CF110, CF112, CF119, CF201, CF205, CF220, CF232, CF235                                                  |
| <b>L3</b>                                                           | CF301, CF303, CF309, CF310, CF311, CF312, CF313, CF315                                                                |
| <b>L4</b>                                                           | CF116, CF120, CF217                                                                                                   |
| <b>L5</b>                                                           | CF411, CF413                                                                                                          |
| <b>L6</b>                                                           | IL1403, 229, UC77                                                                                                     |
| <b>L7</b>                                                           | CF410                                                                                                                 |
| <b>L8</b>                                                           | CF230                                                                                                                 |
| <b>L9</b>                                                           | CF302                                                                                                                 |
| <b>L10</b>                                                          | CF314                                                                                                                 |
| <b>L11</b>                                                          | CF409                                                                                                                 |
| <b>L12</b>                                                          | CF307                                                                                                                 |
| <b>L13</b>                                                          | 275, UC063, CV56, C10, UL8, 184                                                                                       |
| <b>L14</b>                                                          | UC08, UC11                                                                                                            |
| <b>L15</b>                                                          | KF147                                                                                                                 |
| <b>L16</b>                                                          | NCDO2118                                                                                                              |
| <b>L17</b>                                                          | AI06                                                                                                                  |
| <b>L18</b>                                                          | IO1                                                                                                                   |
| <b>L19</b>                                                          | S0                                                                                                                    |
| <b>L20</b>                                                          | UC06                                                                                                                  |
| <b>L21</b>                                                          | KLDS4                                                                                                                 |
| <b>Pan-genomic <i>L. lactis</i> subsp. <i>cremoris</i> lineages</b> |                                                                                                                       |
| <b>Lineage</b>                                                      | <b>Isolates</b>                                                                                                       |
| <b>C1</b>                                                           | CF123, CF105, CF122, CF126, CF233, CF101, CF125, CF115, CF209, CF107, CF228, CF114                                    |
| <b>C2</b>                                                           | CF130, CF225, CF132, CF213, CF113, CF206, CF231                                                                       |
| <b>C3</b>                                                           | CF128, CF129, CF214, CF223, CF229, CF103                                                                              |
| <b>C4</b>                                                           | 158, UC5099, UC109, CF305                                                                                             |
| <b>C5</b>                                                           | CF401, CF404, CF406, CF403, CF407                                                                                     |
| <b>C6</b>                                                           | CF117, CF121                                                                                                          |
| <b>C7</b>                                                           | CF108, CF118                                                                                                          |
| <b>C8</b>                                                           | JM3, SK11                                                                                                             |
| <b>C9</b>                                                           | CF219, CF221                                                                                                          |
| <b>C10</b>                                                          | CF208, CF218                                                                                                          |
| <b>C11</b>                                                          | CF402, CF405                                                                                                          |
| <b>C12</b>                                                          | CF412                                                                                                                 |
| <b>C13</b>                                                          | CF414                                                                                                                 |
| <b>C14</b>                                                          | CF408                                                                                                                 |
| <b>C15</b>                                                          | CF127                                                                                                                 |

|            |                |
|------------|----------------|
| <b>C16</b> | CF207          |
| <b>C17</b> | CF222          |
| <b>C18</b> | JM1            |
| <b>C19</b> | CF304          |
| <b>C20</b> | A76            |
| <b>C21</b> | CF308          |
| <b>C22</b> | CF216          |
| <b>C23</b> | CF306          |
| <b>C24</b> | JM2            |
| <b>C25</b> | JM4            |
| <b>C26</b> | CF133          |
| <b>C27</b> | KW2            |
| <b>C28</b> | MG1363, NZ9000 |
